# Supplementary material
Source: HighWire-hosted journal article supplement (https://rapm.bmj.com/highwire/filestream/18039/field_highwire_adjunct_files/1/rapm-2021-103136supp002_data_supplement.pdf)
Supplement: rapm-2021-103136supp002_data_supplement.pdf [file rapm-2021-103136supp002_data_supplement.pdf]

## APPENDIX 2.0 – SUMMARY OF ROUNDS 1, 2 AND 3

| Item                                                                                 | Round 1                                                                                                                        | Round 2                   | Round 3           | Overall Outcome              |
|--------------------------------------------------------------------------------------|--------------------------------------------------------------------------------------------------------------------------------|---------------------------|-------------------|------------------------------|
| <b>Patient name</b>                                                                  | Progressed to round 2                                                                                                          | Accepted                  |                   | Accepted                     |
| <b>Patient age</b>                                                                   | Progressed to round 2 and item clarified with “(if you believe date of birth is sufficient, please disagree)”                  | Rejected                  |                   | Rejected                     |
| <b>Patient date of birth</b>                                                         | Progressed to round 2                                                                                                          | Accepted                  |                   | Accepted                     |
| <b>Patient gender</b>                                                                | Progressed to round 2                                                                                                          | For discussion in round 3 | 78% agree (36/46) | Accepted                     |
| <b>Patient medical record number / hospital number</b>                               | Progressed to round 2                                                                                                          | Accepted                  |                   | Accepted                     |
| <b>Patient weight</b>                                                                | Progressed to round 2                                                                                                          | Accepted                  |                   | Accepted                     |
| <b>Patient height</b>                                                                | Progressed to round 2                                                                                                          | For discussion in round 3 | 96% agree (45/47) | Accepted                     |
| <b>Patient BMI</b>                                                                   | Rejected                                                                                                                       |                           |                   | Rejected                     |
| <b>Patient ASA physical status classification</b>                                    | Progressed to round 2                                                                                                          | Accepted                  |                   | Accepted                     |
| <b>Patient allergies</b>                                                             | Progressed to round 2                                                                                                          | Accepted                  |                   | Accepted                     |
| <b>Block performed by _____ (name)</b>                                               | Progressed to round 2                                                                                                          | Accepted                  |                   | Accepted                     |
| <b>Grade of block performer (e.g. Consultant, Fellow, Resident, Registrar etc.)</b>  | Added for round 2                                                                                                              | For discussion in round 3 | 68% agree (32/47) | Accepted with weak agreement |
| <b>Name of supervisor (if applicable)</b>                                            | Added for round 2                                                                                                              | Accepted                  |                   | Accepted                     |
| <b>Name of assistant (if applicable)</b>                                             | Added for round 2                                                                                                              | Rejected                  |                   | Rejected                     |
| <b>Patient consent</b>                                                               | Progressed to round 2 and re-worded as “Documentation of patient consent gained (as per local standards e.g. written, verbal)” | Accepted                  |                   | Accepted                     |
| <b>Individual risks of procedure discussed and documented</b>                        | Progressed to round 2 and re-worded as: “Documentation of individual risks of procedure discussed (as per local standards)”    | Accepted                  |                   | Accepted                     |
| <b>Pre-anesthetic evaluation</b>                                                     | Progressed to round 2 and re-worded as “Pre-anaesthetic/block evaluation”                                                      | For discussion in round 3 | 96% agree (45/47) | Accepted                     |
| <b>Pre-procedure diagnosis (post-operative pain management / surgical diagnosis)</b> | Progressed to round 2                                                                                                          | For discussion in round 3 | 77% agree (36/47) | Accepted                     |
| <b>Timeout / WHO checklist</b>                                                       | Progressed to round 2                                                                                                          | For discussion in round 3 | 57% agree (28/49) | Accepted with weak agreement |
| <b>Stop moment performed</b>                                                         | Progressed to round 2                                                                                                          | For discussion in round 3 | 80% agree (40/50) | Accepted                     |
| <b>Coagulation considered</b>                                                        | Progressed to round 2                                                                                                          | For discussion in round 3 | 50% agree (24/48) | Accepted with weak agreement |
| <b>Intravenous access</b>                                                            | Progressed to round 2                                                                                                          | Accepted                  |                   | Accepted                     |

|                                                                                              |                                                                 |                           |                                                                  |          |
|----------------------------------------------------------------------------------------------|-----------------------------------------------------------------|---------------------------|------------------------------------------------------------------|----------|
| <b>Regional anesthesia procedure name</b>                                                    | Progressed to round 2                                           | Accepted                  |                                                                  | Accepted |
| <b>Indication for regional anesthesia (surgical anesthesia or analgesia)</b>                 | Progressed to round 2                                           | For discussion in round 3 | 48% agree (23/48)                                                | Rejected |
| <b>Request by surgeon</b>                                                                    | Rejected                                                        |                           |                                                                  | Rejected |
| <b>Patient position during regional anesthesia procedure</b>                                 | Progressed to round 2                                           | Accepted                  |                                                                  | Accepted |
| <b>Monitors applied</b>                                                                      | Progressed to round 2                                           | Accepted                  |                                                                  | Accepted |
| <b>Baseline vital signs</b>                                                                  | Progressed to round 2                                           | Accepted                  |                                                                  | Accepted |
| <b>Baseline visual analogue score</b>                                                        | Rejected                                                        |                           |                                                                  | Rejected |
| <b>Pre-medication (type and quantity of sedation)</b>                                        | Progressed to round 2                                           | Accepted                  |                                                                  | Accepted |
| <b>Level of sedation (no sedation / light sedation / deep sedation / general anesthesia)</b> | Progressed to round 2                                           | Accepted                  |                                                                  | Accepted |
| <b>Rationale for block performance under spinal, epidural or general anesthesia</b>          | Rejected                                                        |                           |                                                                  | Rejected |
| <b>Time and date of regional anesthesia procedure</b>                                        | Progressed to round 2                                           | Accepted                  |                                                                  | Accepted |
| <b>Aseptic agent used</b>                                                                    | Progressed to round 2                                           | Accepted                  |                                                                  | Accepted |
| <b>Sterile gloves used</b>                                                                   | Progressed to round 2 and item clarified with "(if applicable)" | For discussion in round 3 | 6% agree (3/47)                                                  | Rejected |
| <b>Mask used</b>                                                                             | Progressed to round 2 and item clarified with "(if applicable)" | For discussion in round 3 | 6% agree (3/47)                                                  | Rejected |
| <b>Gown used</b>                                                                             | Rejected                                                        |                           |                                                                  | Rejected |
| <b>Ultrasound probe decontaminated according to local requirements</b>                       | Rejected                                                        |                           |                                                                  | Rejected |
| <b>Sterile ultrasound transducer cover used</b>                                              | Progressed to round 2 and item clarified with "(if applicable)" | For discussion in round 3 | 2% agree (1/48)                                                  | Rejected |
| <b>Sterile drape used</b>                                                                    | Progressed to round 2 and item clarified with "(if applicable)" | For discussion in round 3 | 0% agree (0/47)                                                  | Rejected |
| <b>Aseptic technique used as per local policy</b>                                            |                                                                 |                           | Added during round 3 during live discussion<br>75% agree (36/48) | Accepted |
| <b>Skin infiltration with local anesthetic</b>                                               | Progressed to round 2                                           | Accepted                  |                                                                  | Accepted |
| <b>Needle design: tip, manufacturer, length, gauge</b>                                       | Progressed to round 2                                           | Accepted                  |                                                                  | Accepted |

|                                                                                           |                                                                                                                             |                           |                   |          |
|-------------------------------------------------------------------------------------------|-----------------------------------------------------------------------------------------------------------------------------|---------------------------|-------------------|----------|
| <b>Local anesthetic used for regional anesthesia technique (concentration and volume)</b> | Progressed to round 2                                                                                                       | Accepted                  |                   | Accepted |
| <b>Adrenaline dose if used (concentration)</b>                                            | Progressed to round 2                                                                                                       | Accepted                  |                   | Accepted |
| <b>Adjunct used</b>                                                                       | Progressed to round 2 and item clarified with "(e.g. bicarbonate, clonidine etc.)"                                          | Accepted                  |                   | Accepted |
| <b>Side of block</b>                                                                      | Progressed to round 2                                                                                                       | Accepted                  |                   | Accepted |
| <b>Blocked side marked</b>                                                                | Progressed to round 2                                                                                                       | For discussion in round 3 | 28% agree (13/47) | Rejected |
| <b>Technique of needle localization (ultrasound / nerve stimulator / landmark)</b>        | Progressed to round 2                                                                                                       | Accepted                  |                   | Accepted |
| <b>Approach used (in plane / out of plane)</b>                                            | Progressed to round 2                                                                                                       | For discussion in round 3 | 19% agree (9/47)  | Rejected |
| <b>No EMR &lt; ___mA (when applicable)</b>                                                | Progressed to round 2 and re-worded as "No Evoked Motor Response < ___mA (when applicable i.e. when nerve stimulator used)" | Accepted                  |                   | Accepted |
| <b>Minimum current and current duration</b>                                               | Progressed to round 2 and item clarified with "(if nerve stimulator used)"                                                  | Accepted                  |                   | Accepted |
| <b>Description of motor response</b>                                                      | Progressed to round 2 and item clarified with "(if nerve stimulator used)"                                                  | For discussion in round 3 | 17% agree (8/47)  | Rejected |
| <b>Description of quality of paresthesia</b>                                              | Progressed to round 2 and item clarified with "(if using paresthesia technique)"                                            | For discussion in round 3 | 6% agree (3/48)   | Rejected |
| <b>Catheter tip location confirmed by ultrasound / nerve stimulator</b>                   | Progressed to round 2                                                                                                       | For discussion in round 3 | 4% agree (2/48)   | Rejected |
| <b>Technique of injection (via needle or catheter)</b>                                    | Progressed to round 2                                                                                                       | For discussion in round 3 | 17% agree (8/48)  | Rejected |
| <b>Note on incremental injection</b>                                                      | Progressed to round 2                                                                                                       | For discussion in round 3 | 8% agree (4/48)   | Rejected |
| <b>Extra-neural spread visualized</b>                                                     | Progressed to round 2                                                                                                       | For discussion in round 3 | 21% agree (10/48) | Rejected |
| <b>Presence / absence nerve swelling</b>                                                  |                                                                                                                             | Added for round 3         | 19% agree (9/48)  | Rejected |
| <b>Note on resistance during injection (pressure &lt; 15psi)</b>                          | Progressed to round 2                                                                                                       | For discussion in round 3 | 8% agree (4/48)   | Rejected |
| <b>Absence of blood on aspiration</b>                                                     | Progressed to round 2                                                                                                       | Accepted                  |                   | Accepted |
| <b>Needle depth before injection</b>                                                      | Rejected                                                                                                                    |                           |                   | Rejected |
| <b>Catheter depth at the skin</b>                                                         | Progressed to round 2                                                                                                       | Accepted                  |                   | Accepted |
| <b>Absence of pain / paresthesia during injection</b>                                     | Progressed to round 2                                                                                                       | Accepted                  |                   | Accepted |
| <b>Technique (approach used e.g. median / paramedian)</b>                                 | Progressed to round 2                                                                                                       | Accepted                  |                   | Accepted |
| <b>Vertebral level of needle insertion</b>                                                | Progressed to round 2                                                                                                       | Accepted                  |                   | Accepted |

|                                                                                                 |                                                                          |                           |                   |          |
|-------------------------------------------------------------------------------------------------|--------------------------------------------------------------------------|---------------------------|-------------------|----------|
| <b>Technique used: Loss of resistance to saline/air for epidural insertion</b>                  | Progressed to round 2                                                    | Accepted                  |                   | Accepted |
| <b>Number of attempts</b>                                                                       | Progressed to round 2                                                    | Accepted                  |                   | Accepted |
| <b>Epidural needle depth at loss of resistance</b>                                              | Progressed to round 2                                                    | Accepted                  |                   | Accepted |
| <b>Catheter depth at the skin</b>                                                               | Progressed to round 2                                                    | Accepted                  |                   | Accepted |
| <b>Method used to secure catheter</b>                                                           | Added for round 2                                                        | Rejected                  |                   | Rejected |
| <b>Note on aspiration and action taken</b>                                                      | Progressed to round 2                                                    | Accepted                  |                   | Accepted |
| <b>Epidural test dose</b>                                                                       | Progressed to round 2 and item clarified with "(if applicable)"          | Accepted                  |                   | Accepted |
| <b>Absence of pain / paresthesia during injection</b>                                           | Progressed to round 2                                                    | Accepted                  |                   | Accepted |
| <b>Dermatomal level of spinal or epidural block achieved</b>                                    | Progressed to round 2 and item clarified with "(if assessed)"            | Accepted                  |                   | Accepted |
| <b>Complications (neuraxial)</b>                                                                | Progressed to round 2                                                    | Accepted                  |                   | Accepted |
| <b>Adequacy of regional anesthesia procedure</b>                                                | Progressed to round 2                                                    | For discussion in round 3 | 36% agree (17/47) | Rejected |
| <b>Complications (nerve block)</b>                                                              | Progressed to round 2                                                    | Accepted                  |                   | Accepted |
| <b>Ultrasound image included in patient record (if US used)</b>                                 | Added for round 2                                                        | Rejected                  |                   | Rejected |
| <b>Patient vital signs after the procedure</b>                                                  | Progressed to round 2                                                    | Accepted                  |                   | Accepted |
| <b>Post block monitoring completed by _____/ handed over/off to _____ (e.g. Recovery, PACU)</b> | Added for round 2                                                        | For discussion in round 3 | 6% agree (3/47)   | Rejected |
| <b>Patient visual analogue score after the procedure</b>                                        | Rejected                                                                 |                           |                   | Rejected |
| <b>Post procedure instructions</b>                                                              | Progressed to round 2 and item clarified with "(as per local standards)" | Accepted                  |                   | Accepted |
